# Supplementary material
Source: PubMed Central journal article supplement (PMC7494315)
Supplement: mmc1.pdf [file mmc1.pdf]

# THE LANCET Neurology

## Supplementary appendix

This appendix formed part of the original submission. We post it as supplied by the authors.

Supplement to: McAlpine LS, Zubair AS, Moeller J, Baehring J, Spudich S. Lessons from a neurology consult service for patients with COVID-19. *Lancet Neurol* 2020; **19**: 806–07.

**Appendix 1.** Central and peripheral nervous system sequelae of COVID-19. Cases of encephalitis, acute disseminated encephalomyelitis (ADEM), and acute necrotizing encephalopathy (ANE) have been reported, affecting the temporal lobe, subcortical white matter, and thalamus, respectively. Additionally, reports have described encephalopathy, seizures, and neuropsychiatric ailments, including psychosis and dementia-like syndromes.<sup>5</sup>

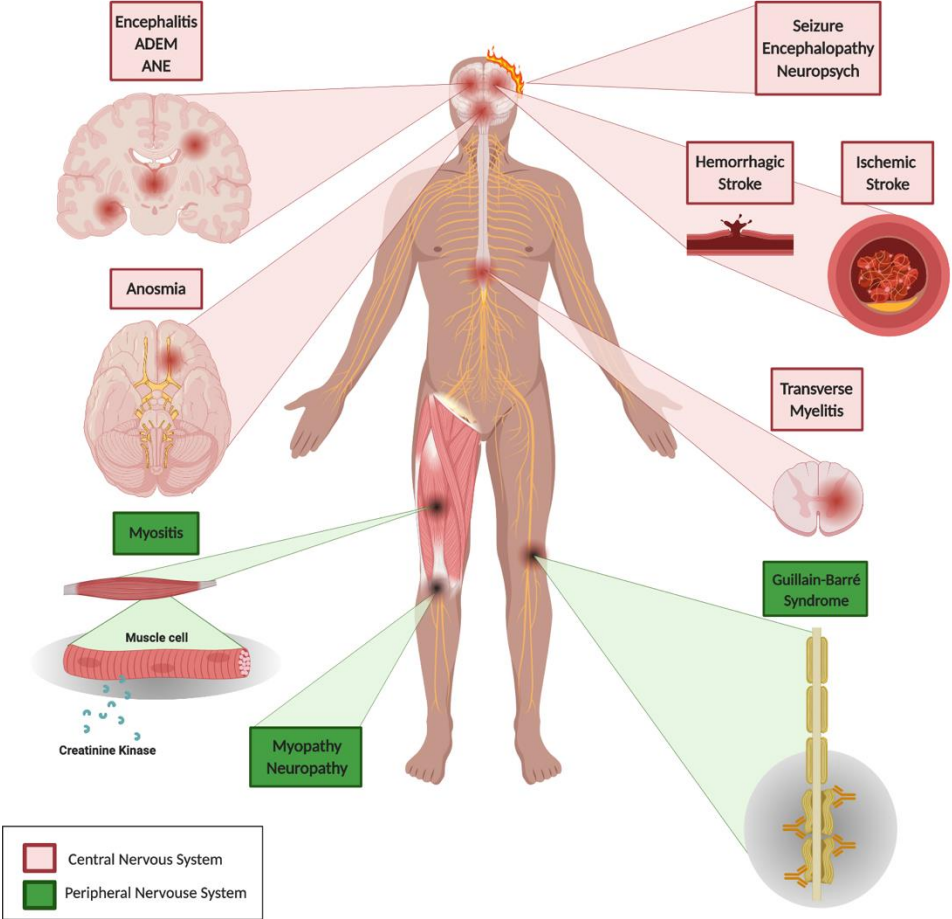

**Appendix 2. Clinical Characteristics of Neurology Consults on Patients with COVID-19.**

|                             |                                                  | <b>Black<br/>n = 25</b> | <b>Hispanic<br/>n = 25</b> | <b>White &amp; Other<br/>n = 50</b> | <b>Total<br/>n = 100</b> |
|-----------------------------|--------------------------------------------------|-------------------------|----------------------------|-------------------------------------|--------------------------|
|                             |                                                  | <b>Median (IQR)</b>     | <b>Median (IQR)</b>        | <b>Median (IQR)</b>                 | <b>Median (IQR)</b>      |
| <b>Age, years</b>           |                                                  | 64 (58-74)              | 55 (45-68)                 | 71 (63-80)                          | 67 (58-76)               |
|                             |                                                  | <b>n (%)</b>            | <b>n (%)</b>               | <b>n (%)</b>                        | <b>n (%)</b>             |
| <b>Sex</b>                  | <b>Female</b>                                    | 11 (44%)                | 9 (36%)                    | 19 (38%)                            | 39 (39%)                 |
|                             | <b>Male</b>                                      | 14 (56%)                | 16 (64%)                   | 31 (62%)                            | 61 (61%)                 |
| <b>Chief Complaint</b>      | <b>Dyspnea or Hypoxia</b>                        | 9 (36%)                 | 11 (44%)                   | 13 (26%)                            | 33 (33%)                 |
|                             | <b>Altered Mental Status</b>                     | 7 (28%)                 | 3 (12%)                    | 10 (20%)                            | 20 (20%)                 |
|                             | <b>Stroke</b>                                    | 3 (12%)                 | 1 (4%)                     | 6 (12%)                             | 10 (10%)                 |
|                             | <b>Seizure</b>                                   | 2 (8%)                  | 1 (4%)                     | 3 (6%)                              | 6 (6%)                   |
|                             | <b>Fall</b>                                      | 1 (4%)                  | 1 (4%)                     | 8 (16%)                             | 10 (10%)                 |
|                             | <b>Fever</b>                                     | 1 (4%)                  | 2 (8%)                     | 3 (6%)                              | 6 (6%)                   |
|                             | <b>Weakness</b>                                  | 0 (0%)                  | 2 (8%)                     | 1 (2%)                              | 3 (3%)                   |
|                             | <b>Abdominal pain</b>                            | 0 (0%)                  | 2 (8%)                     | 1 (2%)                              | 3 (3%)                   |
|                             | <b>Cardiac Arrest</b>                            | 1 (4%)                  | 0 (0%)                     | 1 (2%)                              | 2 (2%)                   |
|                             | <b>Headache</b>                                  | 0 (0%)                  | 1 (4%)                     | 1 (2%)                              | 2 (2%)                   |
|                             | <b>Other</b>                                     | 1 (4%)                  | 1 (4%)                     | 3 (6%)                              | 5 (5%)                   |
| <b>Neurological Disease</b> | <b>Encephalopathy</b>                            | 5 (20%)                 | 6 (24%)                    | 8 (16%)                             | 19 (19%)                 |
|                             | <b>Seizure</b>                                   | 10 (40%)                | 5 (20%)                    | 16 (32%)                            | 31 (31%)                 |
|                             | <b>Ischemic Stroke</b>                           | 6 (24%)                 | 5 (20%)                    | 15 (30%)                            | 26 (26%)                 |
|                             | <b>Hemorrhagic Stroke</b>                        | 0 (0%)                  | 3 (12%)                    | 5 (10%)                             | 8 (8%)                   |
|                             | <b>Neuromuscular*</b>                            | 2 (8%)                  | 2 (8%)                     | 3 (6%)                              | 7 (7%)                   |
|                             | <b>Other pre-existing neurological condition</b> | 1 (4%)                  | 2 (8%)                     | 2 (4%)                              | 5 (5%)                   |
|                             | <b>Other</b>                                     | 1 (4%)                  | 2 (8%)                     | 1 (2%)                              | 4 (4%)                   |

|                  |                 |          |          |          |          |
|------------------|-----------------|----------|----------|----------|----------|
| <b>Mortality</b> | <b>Alive</b>    | 15 (60%) | 21 (84%) | 30 (60%) | 66 (66%) |
|                  | <b>Deceased</b> | 10 (40)  | 4 (16%)  | 20 (40%) | 34 (34%) |

\*Neuromuscular included suspected acute viral myositis, post-viral small fiber neuropathy, Guillain-Barré syndrome, and critical illness polymyopathy
